# Supplementary material for: Association between blood Loa loa microfilarial density and proteinuria levels in a rural area of the Republic of Congo (the MorLo project): a population-based cross-sectional study
Source: PubMed Central journal article supplement (PMC10469262; doi:10.1016/s2666-5247(23)00142-8), 2023-09
Supplement: mmc2.pdf [file mmc2.pdf]

# THE LANCET Microbe

## Supplementary appendix 2

This appendix formed part of the original submission and has been peer reviewed. We post it as supplied by the authors.

Supplement to: Campillo JT, Hemilembolo MC, Pion SDS, et al. Association between blood *Loa loa* microfilarial density and proteinuria levels in a rural area of the Republic of Congo (MorLo): a population-based cross-sectional study. *Lancet Microbe* 2023; published online July 19. [https://doi.org/10.1016/S2666-5247\(23\)00142-8](https://doi.org/10.1016/S2666-5247(23)00142-8).

## Appendix.

**Table 1. References describing renal dysfunction or abnormalities in individuals with loiasis**

| Renal dysfunction or abnormalities                                         | References                                                                                                                                                                                                                                                                                                                                                                                                                                                                                                                                                                                                                                                                                                                                                                                                                                                                                                                                                                                                                                                                                                                                                                                                                                                                                                                                                                                                                                                                                                                                                                                                                                                                                                                                                       |
|----------------------------------------------------------------------------|------------------------------------------------------------------------------------------------------------------------------------------------------------------------------------------------------------------------------------------------------------------------------------------------------------------------------------------------------------------------------------------------------------------------------------------------------------------------------------------------------------------------------------------------------------------------------------------------------------------------------------------------------------------------------------------------------------------------------------------------------------------------------------------------------------------------------------------------------------------------------------------------------------------------------------------------------------------------------------------------------------------------------------------------------------------------------------------------------------------------------------------------------------------------------------------------------------------------------------------------------------------------------------------------------------------------------------------------------------------------------------------------------------------------------------------------------------------------------------------------------------------------------------------------------------------------------------------------------------------------------------------------------------------------------------------------------------------------------------------------------------------|
| Hematuria                                                                  | <ul style="list-style-type: none"> <li>- Gentilini M, Domart A, Brumpt L, Hazard J, le Quintrec Y. [Filariose à <i>Loa loa</i> et protéinurie]. <i>Bulletin de la Société de pathologie exotique</i> 1963; <b>56</b>: 230–40.</li> <li>- Fritel D, Bariety J, Gentilini M. [Loase et néphropathie. Etude anatomoclinique de trois cas]. <i>Med Afr Noire</i> 1970; <b>1</b>: 13–5.</li> <li>- Barierty J, Barbier M, Laigre M-C, <i>et al.</i> [Protéinurie et loase. Etude histologique, optique et électronique d'un cas]. <i>Société médicale des hôpitaux de Paris</i> 1967; <b>118</b>: 1015–25.</li> <li>- Ameer A, Haouri M, Touiti D, Beddouch A, Oukheira H. [Hématurie et filariose. Aspects pathogéniques: à propos d'une observation]. <i>Ann Urol (Paris)</i> 2000; <b>34</b>: 110–1.</li> </ul>                                                                                                                                                                                                                                                                                                                                                                                                                                                                                                                                                                                                                                                                                                                                                                                                                                                                                                                                                    |
| Proteinuria (or albuminuria)                                               | <ul style="list-style-type: none"> <li>- Gentilini M, Domart A, Brumpt L, Hazard J, le Quintrec Y. [Filariose à <i>Loa loa</i> et protéinurie]. <i>Bulletin de la Société de pathologie exotique</i> 1963; <b>56</b>: 230–40.</li> <li>- Fritel D, Bariety J, Gentilini M. [Loase et néphropathie. Etude anatomoclinique de trois cas]. <i>Med Afr Noire</i> 1970; <b>1</b>: 13–5.</li> <li>- Barierty J, Barbier M, Laigre M-C, <i>et al.</i> [Protéinurie et loase. Etude histologique, optique et électronique d'un cas]. <i>Société médicale des hôpitaux de Paris</i> 1967; <b>118</b>: 1015–25.</li> <li>- Schneider J. [Problèmes diagnostiques et thérapeutiques de médecine tropicale dans la pratique médicale courante en France]. <i>Bulletin de la société de pathologie exotique</i> 1964; <b>57</b>: 719–65.</li> <li>- Zuidema PJ. Renal changes in loiasis. <i>Folia Med Neerl</i> 1971; <b>14</b>: 168–72.</li> <li>- Janssens PG, van Bogaert L, Tverdý G, Wanson M. [Réflexions sur le sort des microfilaires de <i>Loa loa</i> dans l'organisme humain parasité. Manifestations viscérales provoquées par leur infiltration dans les tissus]. <i>Bulletin de la Société de pathologie exotique</i> 1958; <b>4</b>: 680–93.</li> <li>- Arborio M, Schill H, Neveux Y, <i>et al.</i> [Néphropathie et filariose à <i>Loa loa</i> traitée par ivermectine]. <i>Thérapeutiques antiparasitaires : communications</i>. 1995; <b>55</b></li> </ul>                                                                                                                                                                                                                                                                                                |
| Glomerulopathies                                                           | <ul style="list-style-type: none"> <li>- Fritel D, Bariety J, Gentilini M. [Loase et néphropathie. Etude anatomoclinique de trois cas]. <i>Med Afr Noire</i> 1970; <b>1</b>: 13–5.</li> <li>- Pillay VKG, Kirch E, Kurtzam NA. Glomerulopathy associated with filarial loiasis. <i>JAMA</i> 1973; <b>225</b>: 179–179.</li> <li>- Pakasa NM, Nseka NM, Nyimi LM. Secondary collapsing glomerulopathy associated with <i>Loa loa</i> filariasis. <i>American Journal of Kidney Diseases</i> 1997; <b>30</b>: 836–9.</li> <li>- Pérez Pérez AJ, Sobrado J, Cigarrán S, Valdés R, González L, Courel M. [Filariasis <i>loa-loa</i> como causa de uremia terminal]. <i>Nefrologia</i> 1987; <b>7</b>: 183–5.</li> <li>- Malik STA, McHugh M, Morley AR, Ngu J, Qureshi M, Wilkinson R. Filariasis (<i>Loa loa</i>) associated with membranous glomerulonephritis: demonstration of filarial antigen. <i>Kidney interactions</i> 1981; <b>20</b>: 157–157.</li> <li>- Lukiana T, Mandina M, Situakibanza NH, <i>et al.</i> A possible case of spontaneous <i>Loa loa</i> encephalopathy associated with a glomerulopathy. <i>Filaria J</i> 2006; <b>5</b>.</li> <li>- Katner H, Eugene Beyt B, Krotoski WA. Loiasis and renal failure. <i>South Med J</i> 1984; <b>77</b>: 907–8.</li> <li>- Adebajol A O, Akinsola' A, Maizels3 RM, Cawston' TE, Haziernan' BL. Rheumatoid factor and rheumatoid factor isotypes in loiasis with and without accompanying glomerulonephritis. <i>Transactions of the royal society of tropical medicine and hygiene</i> 1992; <b>86</b>: 667–9.</li> <li>- Abel L, Joly V, Yeni P, Carbon C. Apheresis in the management of loiasis with high microfilariaemia and renal disease. <i>Br Med J</i> 1986; <b>292</b>: 24–5.</li> </ul> |
| Nephrotic syndromes                                                        | <ul style="list-style-type: none"> <li>- Stephens L, Peat D, Chiodini P. Nephrotic syndrome due to loiasis following a tropical adventure holiday: a case report and review of the literature. <i>Clin Nephrol</i> 2001; <b>56</b>: 247–50.</li> <li>- Pereda PiA, Marcos GR, Plaza MV, Gonzales JC, Garcia EG. Complete remission of loiasis-associated nephrotic syndrome with collapsing glomerulopathy after diethylcarbamazine treatment. <i>Enf Emerg</i> 2010; <b>12</b>: 155–8.</li> </ul>                                                                                                                                                                                                                                                                                                                                                                                                                                                                                                                                                                                                                                                                                                                                                                                                                                                                                                                                                                                                                                                                                                                                                                                                                                                               |
| Remission of renal disorder after administration of antifilarial treatment | <ul style="list-style-type: none"> <li>- Pereda PiA, Marcos GR, Plaza MV, Gonzales JC, Garcia EG. Complete remission of loiasis-associated nephrotic syndrome with collapsing glomerulopathy after diethylcarbamazine treatment. <i>Enf Emerg</i> 2010; <b>12</b>: 155–8.</li> <li>- Hall C, Stephens L, Peat D, Chiodini P. Nephrotic syndrome due to loiasis following a tropical adventure holiday: a case report and review of the literature. <i>Clin Nephrol</i> 2001; <b>56</b>: 247–50.</li> <li>- Zuidema PJ. Renal changes in loiasis. <i>Folia Med Neerl</i> 1971; <b>14</b>: 168–72.</li> <li>- Janssens PG, van Bogaert L, Tverdý G, Wanson M. [Réflexions sur le sort des microfilaires de <i>Loa loa</i> dans l'organisme humain parasité. Manifestations viscérales provoquées par leur infiltration dans les tissus]. <i>Bulletin de la Société de pathologie exotique</i> 1958; <b>4</b>: 680–93.</li> <li>- Fritel D, Bariety J, Gentilini M. [Loase et néphropathie. Etude anatomoclinique de trois cas]. <i>Med Afr Noire</i> 1970; <b>1</b>: 13–5.</li> <li>- Abel L, Joly V, Yeni P, Carbon C. Apheresis in the management of loiasis with high microfilariaemia and renal disease. <i>Br Med J</i> 1986; <b>292</b>: 24–5.</li> </ul>                                                                                                                                                                                                                                                                                                                                                                                                                                                                                                    |
| Transient increase in renal disorder after                                 | <ul style="list-style-type: none"> <li>- Fritel D, Bariety J, Gentilini M. [Loase et néphropathie. Etude anatomoclinique de trois cas]. <i>Med Afr Noire</i> 1970; <b>1</b>: 13–5.</li> <li>- Cruel T, Arborio M, Schill H, <i>et al.</i> [Néphropathie et filariose à <i>Loa loa</i>. A propos d'un cas de réaction adverse à la prise d'ivermectine]. <i>Bulletin de la Société de pathologie exotique</i> 1997; <b>90</b>: 179–81.</li> </ul>                                                                                                                                                                                                                                                                                                                                                                                                                                                                                                                                                                                                                                                                                                                                                                                                                                                                                                                                                                                                                                                                                                                                                                                                                                                                                                                 |

|                                          |                                                                                                                                                                                                                                                                                                                                                                                                                                                                                                                                                                                                                                                                                                                                                                                                                                                                                                                                                                                                                                                                                                                                                                                                                                                                                                                                                                                                                                                                                                                                                                                                                                                                                                                                                                                                                                                                                                                                                                                                                                                                                                                                                                                   |
|------------------------------------------|-----------------------------------------------------------------------------------------------------------------------------------------------------------------------------------------------------------------------------------------------------------------------------------------------------------------------------------------------------------------------------------------------------------------------------------------------------------------------------------------------------------------------------------------------------------------------------------------------------------------------------------------------------------------------------------------------------------------------------------------------------------------------------------------------------------------------------------------------------------------------------------------------------------------------------------------------------------------------------------------------------------------------------------------------------------------------------------------------------------------------------------------------------------------------------------------------------------------------------------------------------------------------------------------------------------------------------------------------------------------------------------------------------------------------------------------------------------------------------------------------------------------------------------------------------------------------------------------------------------------------------------------------------------------------------------------------------------------------------------------------------------------------------------------------------------------------------------------------------------------------------------------------------------------------------------------------------------------------------------------------------------------------------------------------------------------------------------------------------------------------------------------------------------------------------------|
| administration of antifilarial treatment | <ul style="list-style-type: none"> <li>- Katner H, Eugene Beyt B, Krotoski WA. Loiasis and renal failure. <i>South Med J</i> 1984; <b>77</b>: 907–8.</li> <li>- Gentilini M, Domart A, Brumpt L, Hazard J, le Quintrec Y. [Filariose à <i>Loa loa</i> et protéinurie]. <i>Bulletin de la Société de pathologie exotique</i> 1963; <b>56</b>: 230–40.</li> <li>- Barierty J, Barbier M, Laigre M-C, et al. [Protéinurie et loase. Etude histologique, optique et électronique d'un cas]. <i>Société médicale des hôpitaux de Paris</i> 1967; <b>118</b>: 1015–25.</li> <li>- Arborio M, Schill H, Neveux Y, et al. [Néphropathie et filariose à <i>Loa loa</i> traitée par ivermectine]. <i>Thérapeutiques antiparasitaires : communications</i>. 1995; <b>55</b>.</li> </ul>                                                                                                                                                                                                                                                                                                                                                                                                                                                                                                                                                                                                                                                                                                                                                                                                                                                                                                                                                                                                                                                                                                                                                                                                                                                                                                                                                                                                      |
| Abnormal renal biopsy                    | <ul style="list-style-type: none"> <li>- Pillay VKG, Kirch E, Kurtzam NA. Glomerulopathy associated with filarial loiasis. <i>JAMA</i> 1973; <b>225</b>: 179–179.</li> <li>- Pakasa NM, Nseka NM, Nyimi LM. Secondary collapsing glomerulopathy associated with <i>Loa loa</i> filariasis. <i>American Journal of Kidney Diseases</i> 1997; <b>30</b>: 836–9.</li> <li>- Hall C, Stephens L, Peat D, Chiodini P. Nephrotic syndrome due to loiasis following a tropical adventure holiday: a case report and review of the literature. <i>Clin Nephrol</i> 2001; <b>56</b>: 247–50.</li> <li>- Pereda PiA, Marcos GR, Plaza MV, Gonzales JC, Garcia EG. Complete remission of loiasis-associated nephrotic syndrome with collapsing glomerulopathy after diethylcarbamazine treatment. <i>Enf Emerg</i> 2010; <b>12</b>: 155–8.</li> <li>- Pérez Pérez AJ, Sobrado J, Cigarrán S, Valdés R, González L, Courel M. [Filariasis <i>loa-loa</i> como causa de uremia terminal]. <i>Nefrologia</i> 1987; <b>7</b>: 183–5.</li> <li>- Malik STA, McHugh M, Morley AR, Ngu J, Qureshi M, Wilkinson R. Filariasis (<i>Loa loa</i>) associated with membranous glomerulonephritis: demonstration of filarial antigen. <i>Kidney interactions</i> 1981; <b>20</b>: 157–157.</li> <li>- Katner H, Eugene Beyt B, Krotoski WA. Loiasis and renal failure. <i>South Med J</i> 1984; <b>77</b>: 907–8.</li> <li>- Fritel D, Barierty J, Gentilini M. [Loase et néphropathie. Etude anatomoclinique de trois cas]. <i>Med Afr Noire</i> 1970; <b>1</b>: 13–5.</li> <li>- Cruel T, Arborio M, Schill H, et al. [Néphropathie et filariose à <i>Loa loa</i>. A propos d'un cas de réaction adverse à la prise d'ivermectine]. <i>Bulletin de la Société de pathologie exotique</i> 1997; <b>90</b>: 179–81.</li> <li>- Arborio M, Schill H, Neveux Y, et al. [Néphropathie et filariose à <i>Loa loa</i> traitée par ivermectine]. <i>Thérapeutiques antiparasitaires : communications</i>. 1995; <b>55</b>.</li> <li>- Abel L, Joly V, Yeni P, Carbon C. Apheresis in the management of loiasis with high microfilariaemia and renal disease. <i>Br Med J</i> 1986; <b>292</b>: 24–5.</li> </ul> |
| <i>Loa loa</i> microfilariae in urine    | <ul style="list-style-type: none"> <li>- Barierty J, Barbier M, Laigre M-C, et al. [Protéinurie et loase. Etude histologique, optique et électronique d'un cas]. <i>Société médicale des hôpitaux de Paris</i> 1967; <b>118</b>: 1015–25.</li> <li>- Fritel D, Barierty J, Gentilini M. [Loase et néphropathie. Etude anatomoclinique de trois cas]. <i>Med Afr Noire</i> 1970; <b>1</b>: 13–5.</li> <li>- Katner H, Eugene Beyt B, Krotoski WA. Loiasis and renal failure. <i>South Med J</i> 1984; <b>77</b>: 907–8.</li> </ul>                                                                                                                                                                                                                                                                                                                                                                                                                                                                                                                                                                                                                                                                                                                                                                                                                                                                                                                                                                                                                                                                                                                                                                                                                                                                                                                                                                                                                                                                                                                                                                                                                                                 |

**Table 2. Prevalence of other comorbidities in the population study**

|                                  | Total       | Level of proteinuria |             |                      |                             | p-value* |
|----------------------------------|-------------|----------------------|-------------|----------------------|-----------------------------|----------|
|                                  |             | Negative             | Traces      | Lightly positive (+) | Highly positive (++ or +++) |          |
| <b>N. subjects (n, %)</b>        | 990         | 555 (56.1%)          | 325 (32.8%) | 89 (9.0%)            | 21 (2.1%)                   |          |
| <b>Haematuria (n, %)</b>         | 990         |                      |             |                      |                             | < 0.0001 |
| Negative or Traces               | 907 (91.6%) | 529 (95.3%)          | 299 (92.0%) | 68 (76.4%)           | 11 (52.4%)                  |          |
| Positive                         | 83 (8.4%)   | 26 (4.7%)            | 26 (8.0%)   | 21 (23.6%)           | 10 (47.6%)                  |          |
| <b>Schistosomiasis (n, %)</b>    | 98          | 31                   | 32          | 23                   | 12                          |          |
| Presence of eggs (urines)        | 0 (0.0%)    | 0 (0.0%)             | 0 (0.0%)    | 0 (0.0%)             | 0 (0.0%)                    | N/A      |
| Positive serology (plasma)       | 6 (6.1%)    | 4 (12.9%)            | 0 (0.0%)    | 1 (4.3%)             | 1 (8.3%)                    | N/A      |
| <b>Stools examination (n, %)</b> | 58          | 24                   | 22          | 10                   | 2                           |          |
| Hookworm presence                | 0 (0.0%)    | 0 (0.0%)             | 0 (0.0%)    | 0 (0.0%)             | 0 (0.0%)                    | N/A      |
| <i>Ascaris</i> presence          | 36 (62.1%)  | 16 (66.7%)           | 14 (63.6%)  | 5 (50.0%)            | 1 (50.0%)                   | 0.81     |
| <i>Trichuris</i> presence        | 39 (67.2%)  | 16 (66.7%)           | 13 (59.1%)  | 8 (80.0%)            | 2 (100.0%)                  | 0.61     |

\* Chi-2 for categorical variable (with Yates correction if  $1 n_{ij} < 5$ )

N/A: not applicable

**Table 3. Distribution of the main variables of interest according to haematuria status**

|                                                | Total               | Level of haematuria |                       |                       |                             | p-value* |
|------------------------------------------------|---------------------|---------------------|-----------------------|-----------------------|-----------------------------|----------|
|                                                |                     | Negative            | Traces                | Lightly positive (+)  | Highly positive (++ or +++) |          |
| <b>N. subjects (n, %)</b>                      | 990                 | 895 (90.4%)         | 12 (1.2%)             | 24 (2.4%)             | 59 (6.0%)                   |          |
| <b>Sex-ratio (M/F)</b>                         | 1.67                | 1.8                 | 1.4                   | 1.0                   | 0.8                         | 0.010    |
| <b>Age in years (mean <math>\pm</math> SD)</b> | 50.8 $\pm$ 14.8     | 50.5 $\pm$ 14.7     | 61.5 $\pm$ 9.8        | 54.9 $\pm$ 16.5       | 51.6 $\pm$ 15.9             | 0.023    |
| <b><i>Loa</i> MFD status</b>                   |                     |                     |                       |                       |                             | 0.25     |
| Positive (n, %)                                | 342 (34.5%)         | 301 (33.8%)         | 5 (41.7%)             | 12 (50.0%)            | 24 (41.7%)                  |          |
| <b><i>Loa</i> MFD (mf/mL)</b>                  |                     |                     |                       |                       |                             | 0.25     |
| Arith. Mean $\pm$ SD                           | 2409.4 $\pm$ 7398.5 | 2259.0 $\pm$ 7259.6 | 5036.7 $\pm$ 10 118.1 | 4944.6 $\pm$ 10 852.9 | 3124.7 $\pm$ 7069.9         |          |
| Median [ITQ]                                   | 0 [0-540]           | 0 [0-440]           | 0 [0-4615]            | 120 [0-3735]          | 0 [0-1160]                  |          |
| Geom. Mean                                     | 1647                | 1707                | 1806                  | 3981                  | 2153                        |          |
| <b><i>Loa</i> MFD categories (n, %)</b>        |                     |                     |                       |                       |                             | 0.29     |
| 0 mf/mL                                        | 648 (65.5%)         | 594 (66.4%)         | 7 (58.3%)             | 12 (50.0%)            | 35 (59.3%)                  |          |
| 1-4999 mf/mL                                   | 217 (21.9%)         | 194 (21.7%)         | 2 (16.7%)             | 7 (29.2%)             | 14 (23.7%)                  |          |
| 5000-14 999 mf/mL                              | 82 (8.3%)           | 73 (8.2%)           | 1 (8.3%)              | 3 (12.5%)             | 5 (8.5%)                    |          |
| $\geq$ 15 000 mf/mL                            | 43 (4.3%)           | 34 (3.8%)           | 2 (16.7%)             | 2 (8.3%)              | 5 (8.5%)                    |          |

Abbreviations: SD, Standard deviation; MFD, microfilarial density; ITQ, interquartile range; NC, not calculable; Arith, arithmetic; Geom., Geometric.

\* Chi-2 for categorical variable (with Yates correction if  $1 n_{ij} < 5$ ) and Kruskal-Wallis rank test for continuous variables.
